# Supplementary material for: Graphene oxide as a catalyst for ring opening reactions in amine crosslinking of epoxy resins
Source: Royal Society of Chemistry journal article supplement (doi:10.1039/c6ra00485g), 2016-01-01
Supplement: c6ra00485g1.pdf [file c6ra00485g1.pdf]

**Graphene Oxide as Catalyst for Ring Opening Reactions in Amine Crosslinking of Epoxy  
Resins**

Maria Rosaria Acocella,<sup>a\*</sup> Carola Esposito Corcione,<sup>b\*</sup> Antonella Giuri,<sup>b</sup>  
Alfonso Maffezzoli,<sup>b</sup> Gaetano Guerra <sup>a\*</sup>

<sup>a</sup> Department of Chemistry and Biology and INSTM Research Unit, Università di Salerno, Fisciano  
(SA), Italy

<sup>b</sup> Dipartimento di Ingegneria dell'Innovazione, Università del Salento, Lecce, Italy

Supporting Information

## Characterization techniques

### *Elemental analysis*

Elemental analysis was performed with a Thermo FlashEA 1112 Series CHNS-O analyzer, after pretreating samples in an oven at 100 °C for 12 h, in order to remove the absorbed water.

TABLE S1. Results of elemental analysis on the starting graphite (HSAG) and on the derived oxidized samples.<sup>a</sup>

| Sample | C<br>(wt%) | H<br>(wt%) | N<br>(wt%) | O<br>(wt%) | S<br>(wt%) | C/O |
|--------|------------|------------|------------|------------|------------|-----|
| HSAG   | 99.8       | 0.1        | 0.1        | 0.0        | 0.0        | /   |
| GO     | 63.7       | 0.6        | 0.1        | 33.7       | 1.9        | 1.9 |
| eGO    | 66.1       | 0.5        | 0.1        | 31.4       | 1.9        | 2.1 |

<sup>a</sup> Elemental composition of the anhydrous samples: water contents of nearly 5 %wt. and 6 %wt. are evaluated by TGA for GO and eGO, respectively.

### *BET analysis*

Nitrogen adsorption at liquid nitrogen temperature (-196 °C) was used to measure surface areas of the fillers with a Nova Quantachrome 4200e instrument. Before the adsorption measurement, samples were degassed at 100 °C under nitrogen flow overnight to remove water, and the surface area values were determined by using 11-point BET analysis

The surface area value for HSAG, GO and eGO are 308, 1.6 and 4.6 m<sup>2</sup>/g with correlation factor  $r=0.9996$

### *FTIR spectroscopy*

FTIR spectra were obtained at a resolution of 2.0 cm<sup>-1</sup> with a FTIR (BRUKER Vertex70)spectrometer equipped with deuterated triglycine sulfate (DTGS) detector and a KBr beam splitter, using KBr pellets. The frequency scale was internally calibrated to 0.01 cm<sup>-1</sup> using a He-Ne laser. 32 scans were signal averaged to reduce the noise.

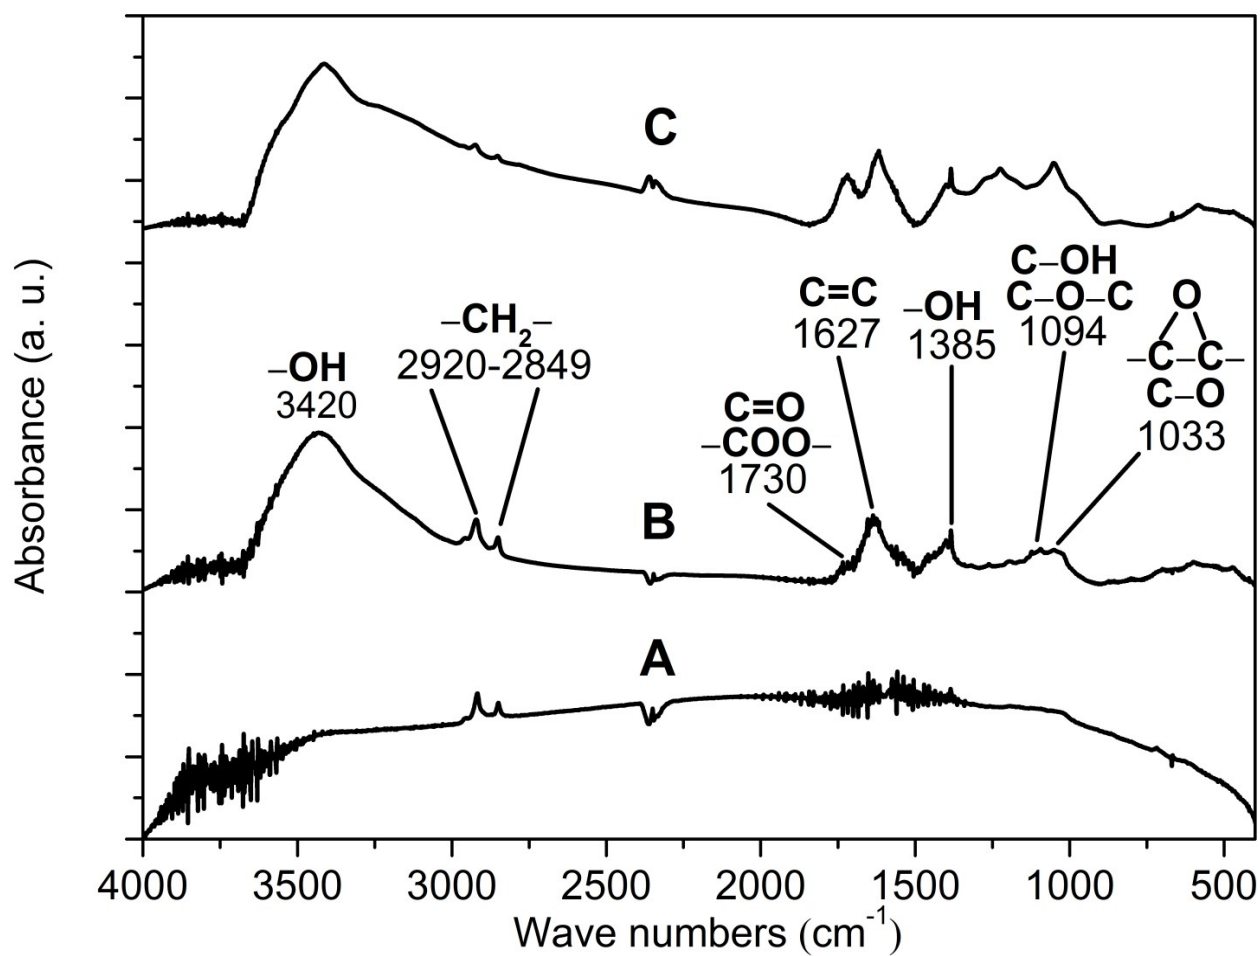

FIGURE S1. FTIR spectra in the range 4000-400  $\text{cm}^{-1}$  of: the starting graphite (A), of the derived GO (B) and eGO (C).
